# Supplementary material for: “Trojan horse” nanoparticle-delivered cancer cell membrane vaccines to enhance cancer immunotherapy by overcoming immune-escape
Source: Royal Society of Chemistry journal article supplement (doi:10.1039/d2bm01432g), 2022-12-17
Supplement: d2bm01432g1.pdf [file d2bm01432g1.pdf]

## Supporting Information

### **“Trojan horse” nanoparticle-delivering cancer cell membrane vaccines to enhance cancer immunotherapy by overcoming immune escape**

Jingjing Wang, Bing Sun, Luyao Sun, Xueming Niu, Li Li\* and Zhi Ping Xu\*

Australian Institute for Bioengineering and Nanotechnology, The University of Queensland,  
Brisbane, QLD 4072, Australia

E-mail: gordonxu@uq.edu.au; l.li2@uq.edu.au.

- 1. Supplementary Figures S1-S13**
- 2. Supplementary Tables S1-S2**

## Supplementary Figures

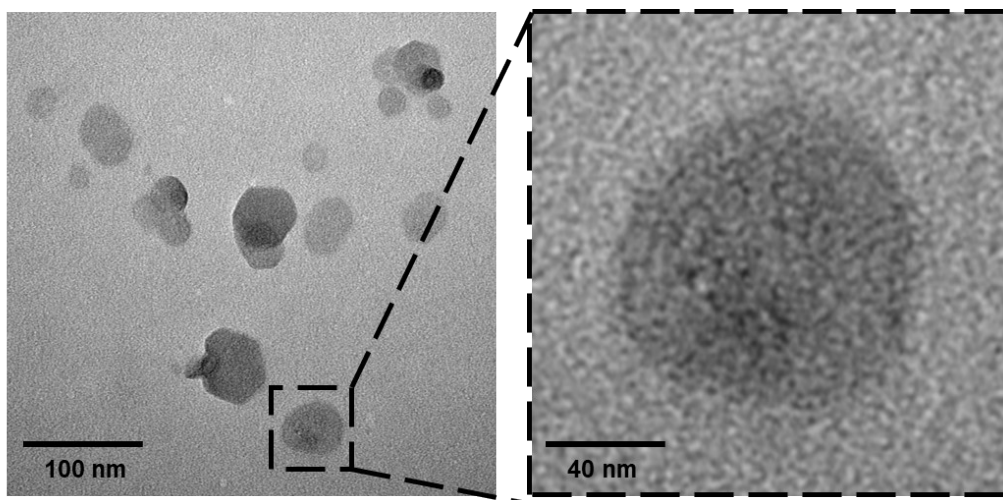

**Figure S1.** TEM images of LDH stained with 0.4% uranyl acetate.

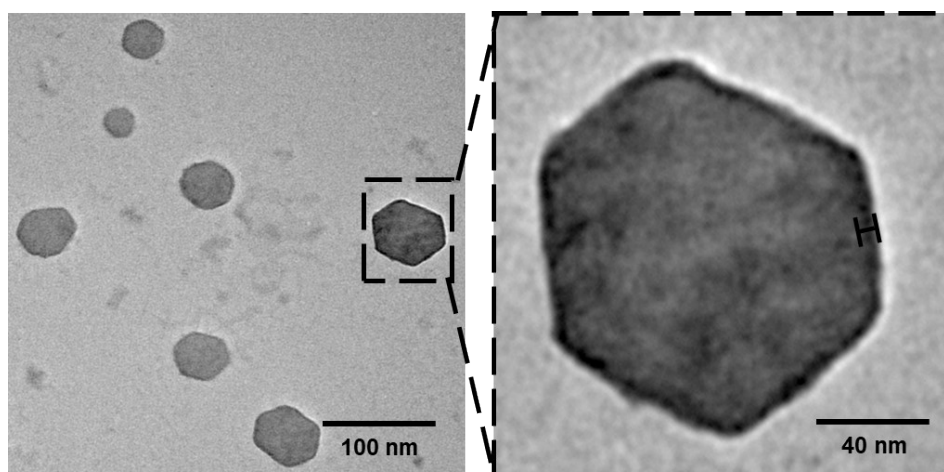

**Figure S2.** TEM images of LGCMB nano-vaccine with the mass ratio of LDH:CCM being 50:1.

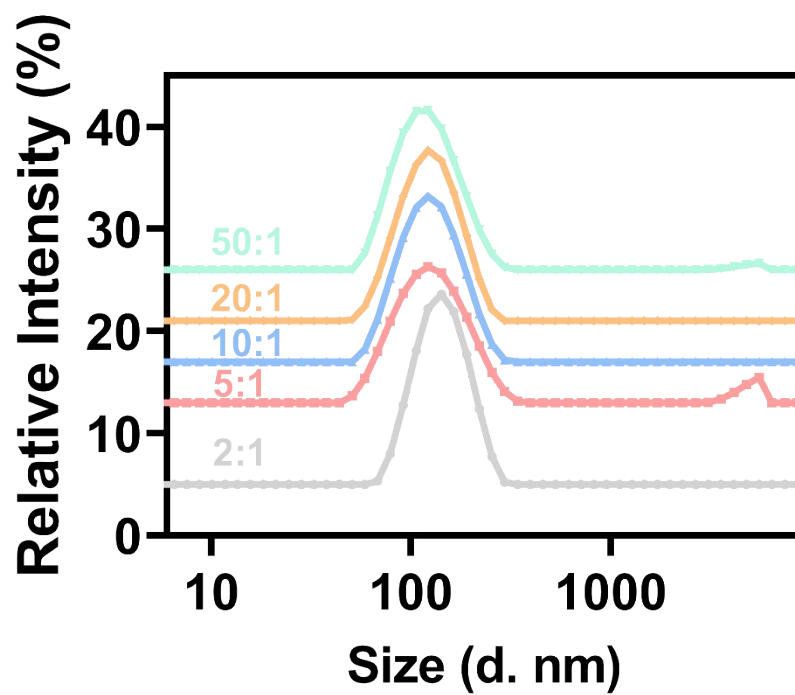

**Figure S3.** Size distribution of LGCMB with different mass ratios of LDH and CCM (LDH:CCM = 2:1, 5:1, 10:1, 20:1, 50:1).

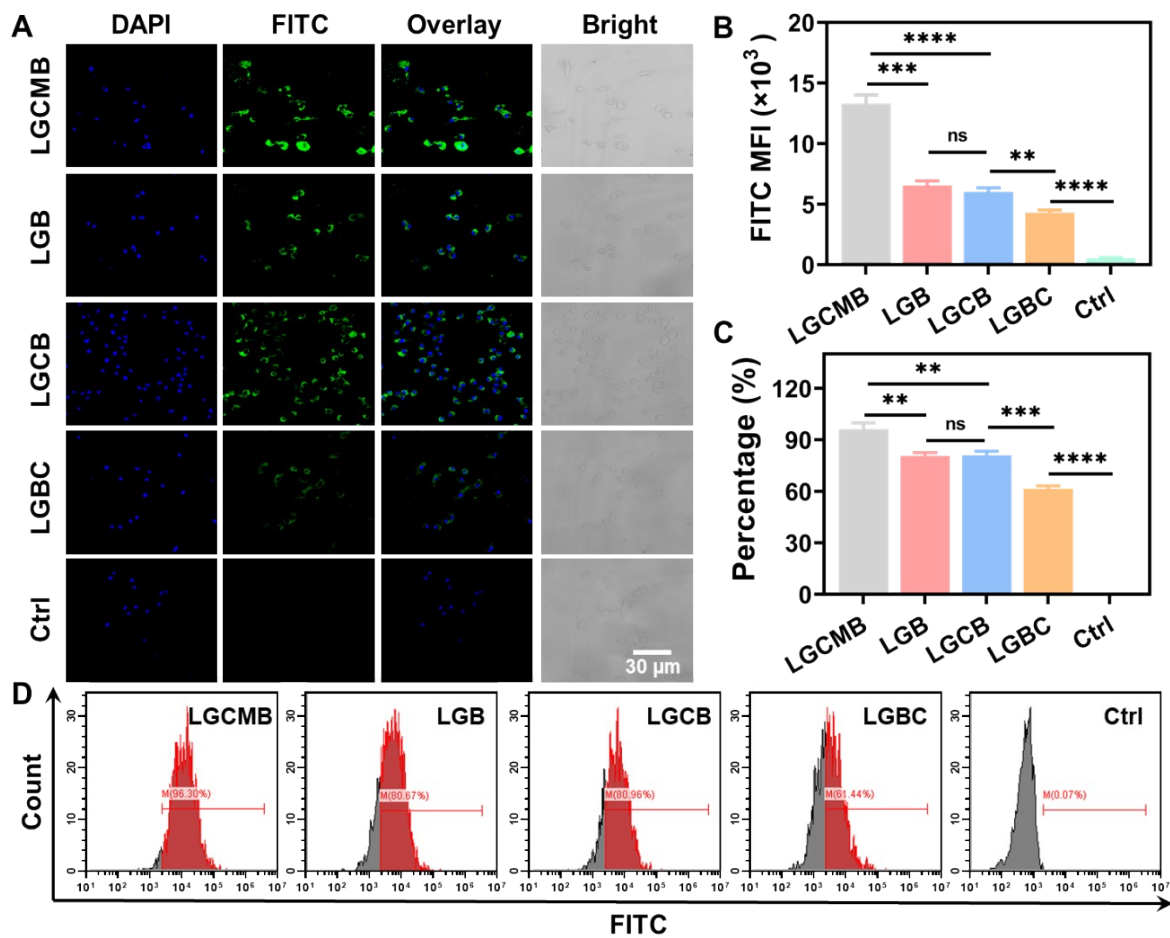

**Figure S4.** Cellular uptake of the LGCMB nano-vaccine by RAW 264.7 cells. (A) RAW 264.7 cells treated with LGCMB, LGB, LGCB and LGBC for 4 h captured by LSCM. (B) MFI and (C) positive cell percentage in RAW 264.7 cells treated with LGCMB nano-vaccines for 4 h. (D) Cell uptake by RAW 264.7 cells analyzed by FACS.

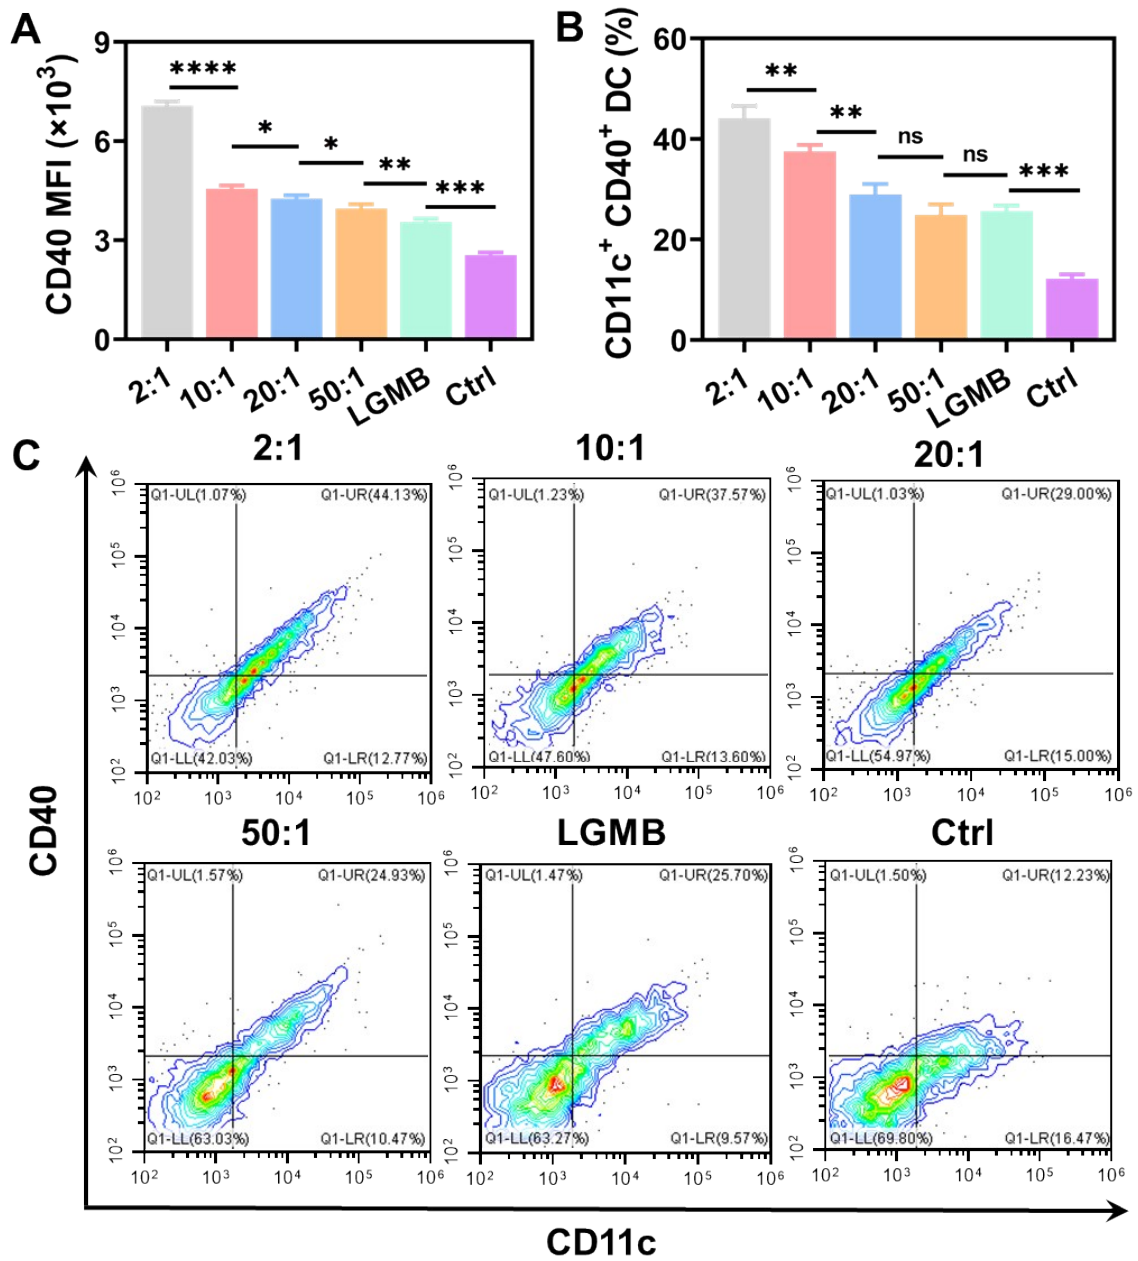

**Figure S5.** BMDC maturation when treated with LGCMB and LGMB for 24 h. (A-B) MFI and CD11c/CD40 positive cell percentage of DC cells treated with LGCMB (LDH:CCM=2:1, 10:1, 20:1, 50:1) and LGMB for 24 h. (C) CD11c and CD40 co-staining of DC cells treated with LGCMB and LGMB for 24 h.

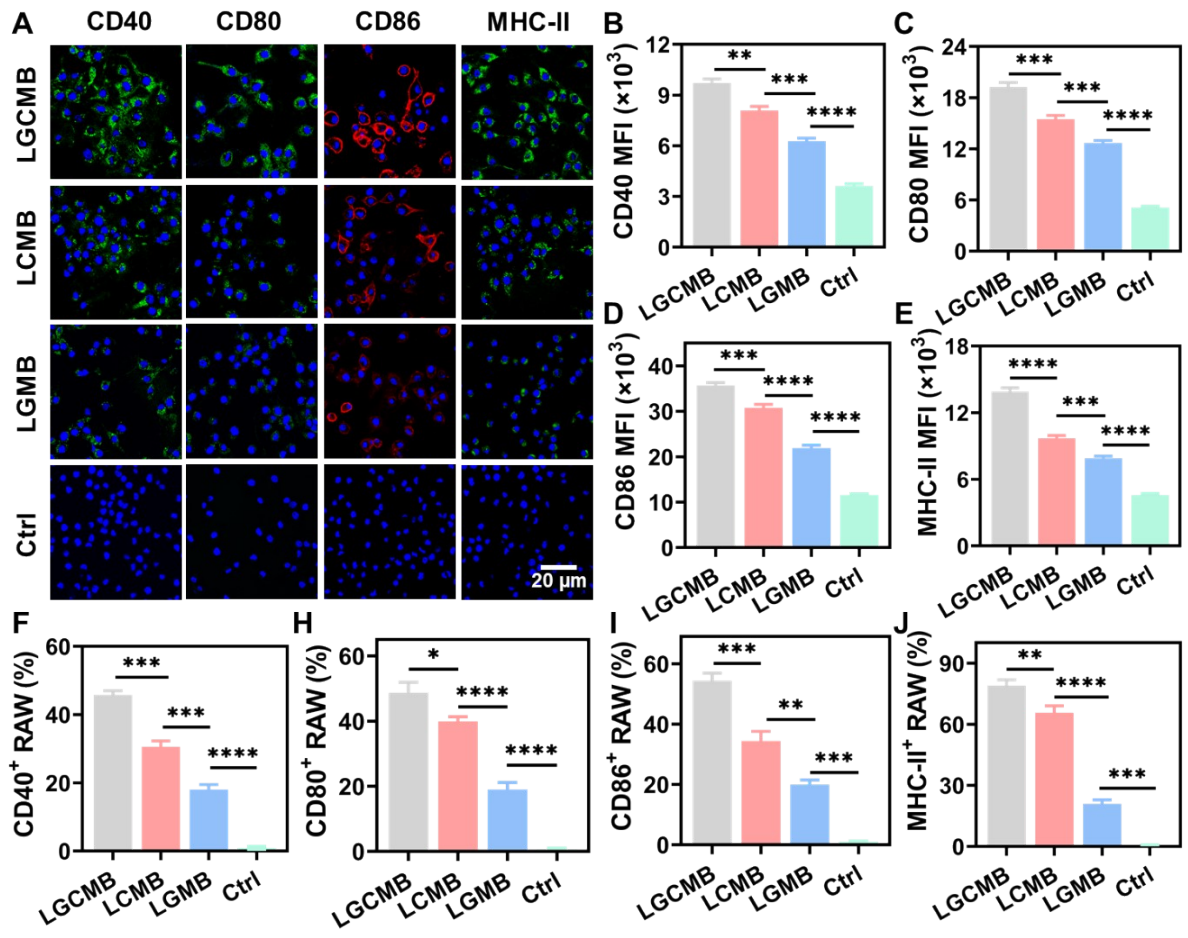

**Figure S6.** RAW 264.7 maturation stimulated by LGCMB nano-vaccines for 24 h. (A) CD40, CD80, CD86 and MHC-II staining of RAW264.7 cells treated with the nano-vaccines captured by LSCM. (B-E) MFI and (F-J) CD40, CD80, CD86, MHC-II positive cell percentage of RAW 264.7 cells.

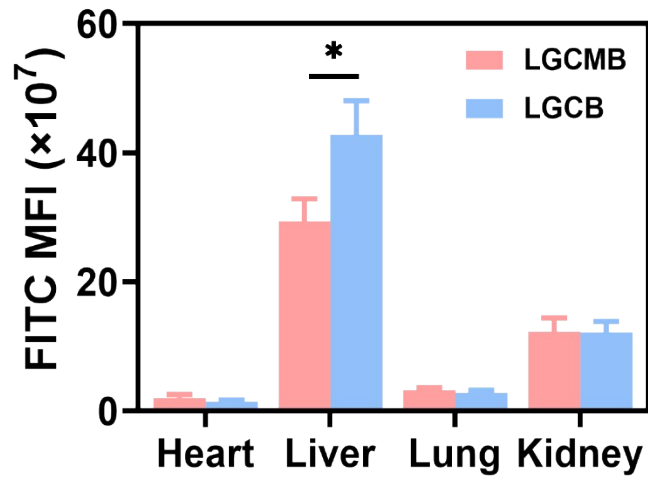

**Figure S7.** The MFI of FITC in the organs (heart, liver, lung, kidney) at 24 h post-injection of the nano-vaccine.



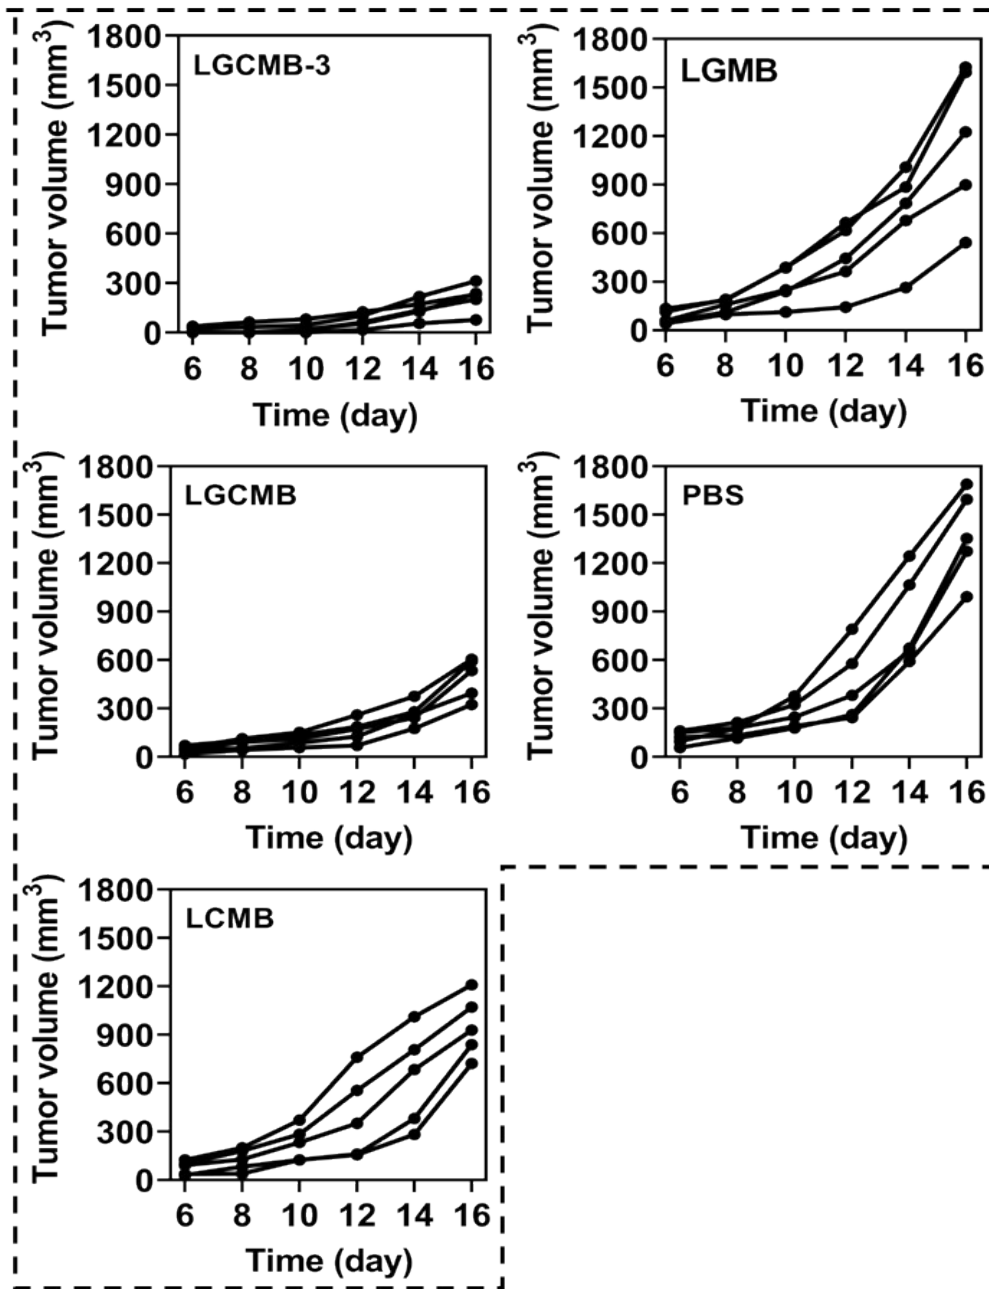

**Figure S8.** Tumor growth of the mice subcutaneously injected with LGCMB-3SC, LGCMB, LCMB, LGMB and PBS.

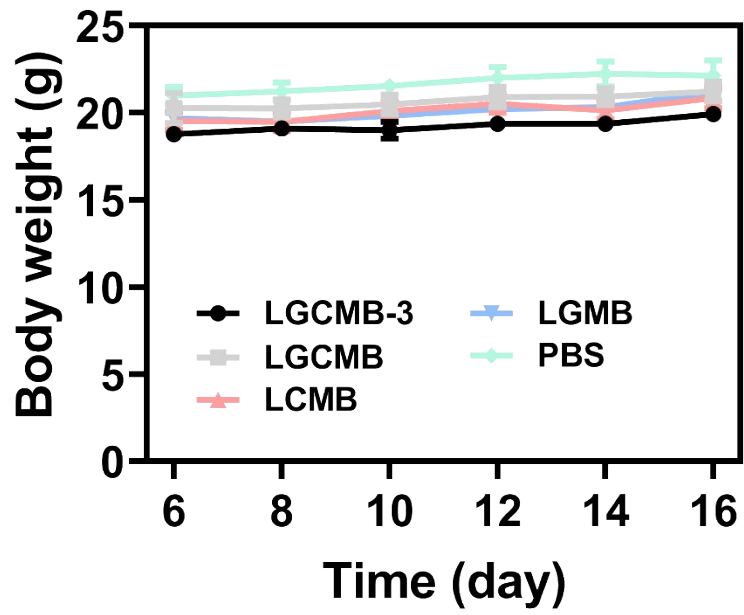

**Figure S9.** Body weight of the mice.

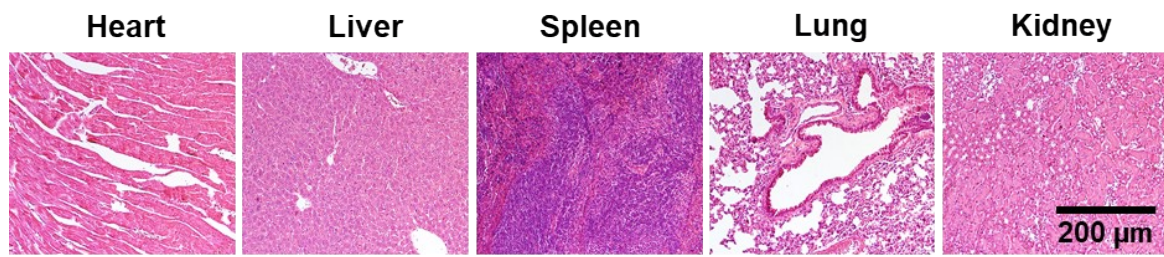

**Figure S10.** H&E staining of the major tissues collected from LGCMB-3 group.

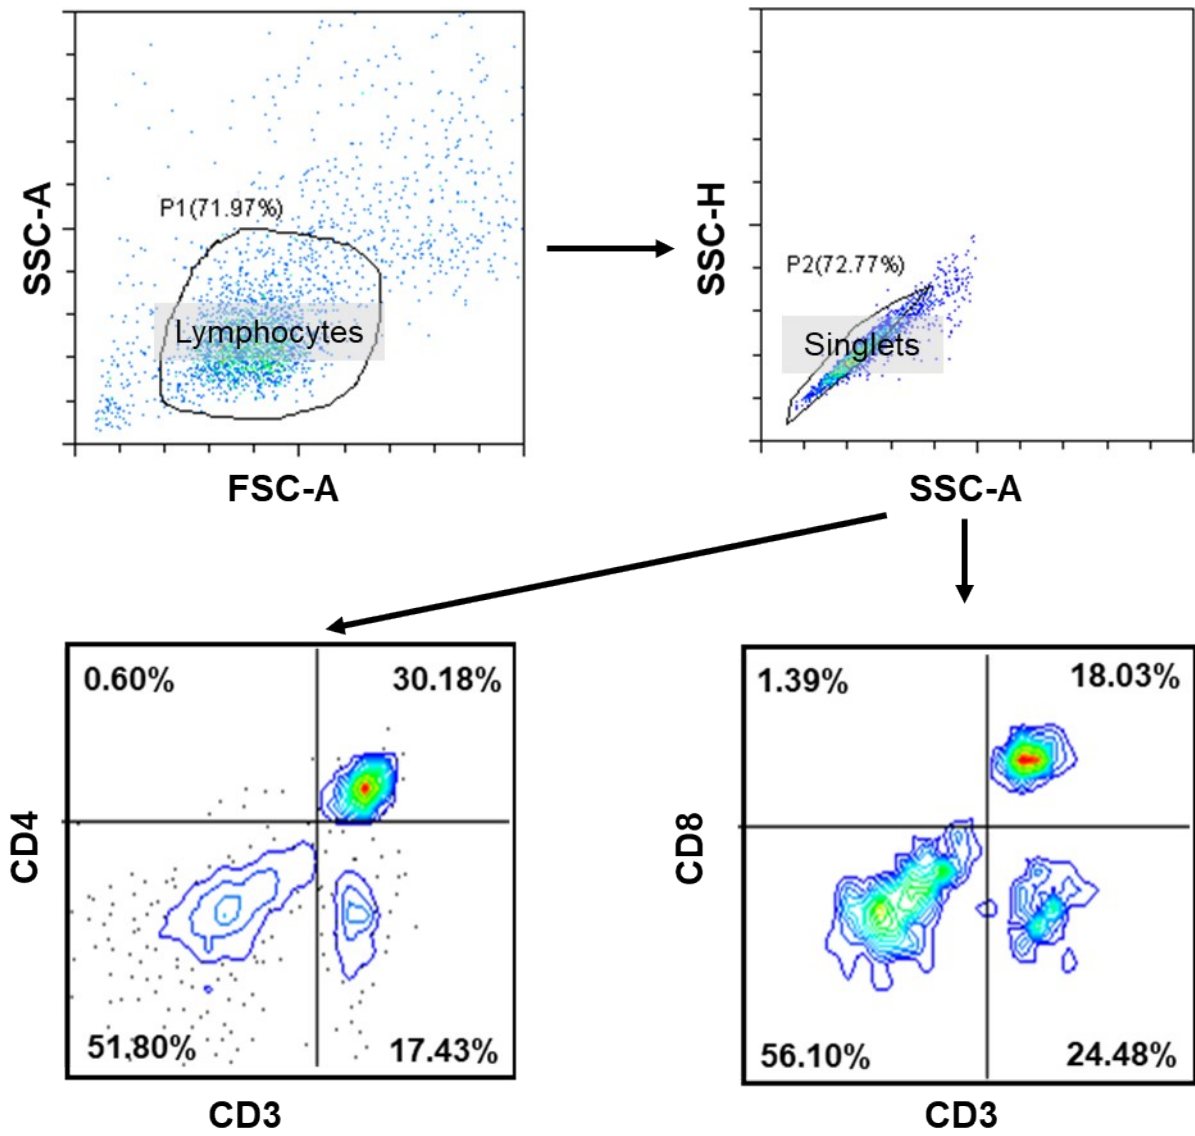

**Figure S11:** Gating strategy to sort CD3<sup>+</sup>CD4<sup>+</sup> and CD3<sup>+</sup>CD8<sup>+</sup> T cells.

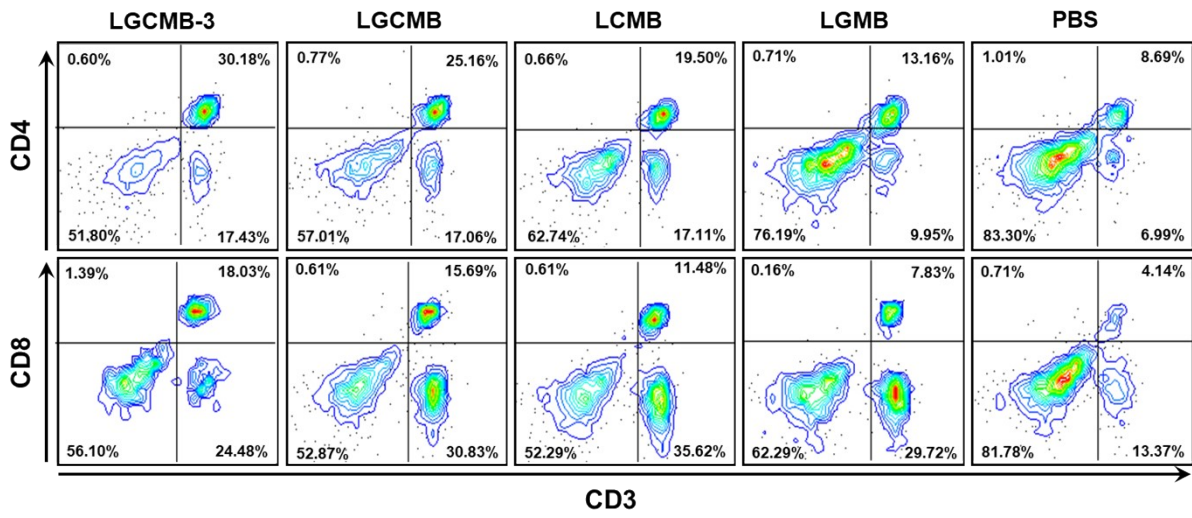

**Figure S12.** FACS analysis of T cell responses in spleen collected from the mice at day 16.

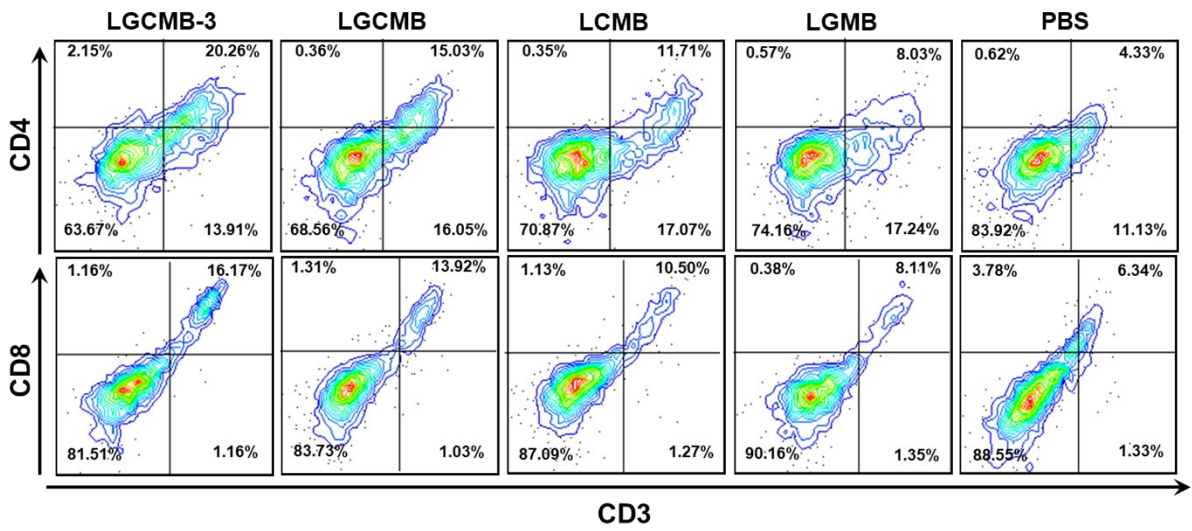

**Figure S13.** FACS analysis of T cell responses in tumor cells collected from the mice at day 16.

**Table S1.** Composition of the nano-vaccines.

| Composition<br>( $\mu\text{g/mL}$ ) | LDH  | CpG | CCM <sup>#</sup> | Mannose | BSA  |
|-------------------------------------|------|-----|------------------|---------|------|
| LGCMB*                              | 1000 | 20  | 500              | 20      | 1280 |
| LGB*                                | 1000 | 20  | N/A              | N/A     | 1300 |
| LGCB*                               | 1000 | 20  | 500              | N/A     | 1300 |
| LGMB*                               | 1000 | 20  | N/A              | 20      | 1280 |
| LCMB*                               | 1000 | N/A | 500              | 20      | 1280 |
| LGBC*                               | 1000 | 20  | 500              | N/A     | 1300 |

\* In the LDH-CCM based nano-vaccine, L/G/C/M/B refers to LDH/CpG/CCM/Mannose/BSA.

<sup>#</sup> The amount of CCM on the nano-vaccine was calculated as the amount of CCM added given high CCM loading efficiency.

**Table S2.** Growth rate of the tumor at day 16 and synergistic effects of LGCMB.

| Growth rate* | LGCMB-3 (%) | LGCMB (C) (%) | LCMB (A) (%) | LGMB (B) (%) | PBS (%)    | CI <sup>#</sup> | Synergy  |
|--------------|-------------|---------------|--------------|--------------|------------|-----------------|----------|
| Volume       | 15.4 ± 6.2  | 35.5 ± 9.0    | 69.1 ± 13.9  | 81.3 ± 33.6  | 100 ± 20.1 | 1.58 ± 0.43     | Moderate |
| Weight       | 13.4 ± 2.4  | 33.8 ± 8.5    | 57.9 ± 11.9  | 70.6 ± 13.8  | 100 ± 21.9 | 1.21 ± 0.15     | Mild     |

\*The growth rate of the tumor after various treatments was calculated based on tumor volume (V) and weight (W) at day 16 using the following formulas:

Growth rate = 1 - Inhibition rate

Inhibition rate (V) = (Tumor V<sub>control</sub> - Tumor V<sub>experimental</sub>)/Tumor V<sub>control</sub> × 100%

Inhibition rate (W) = (Tumor W<sub>control</sub> - Tumor W<sub>experimental</sub>)/Tumor W<sub>control</sub> × 100%

#The combination index (CI) = A×B/C ratio:

<0.8: asynergy

0.8-1.2: additive synergy

1.2-1.4: mild synergy

1.4-1.6: moderate synergy

>1.6: strong synergy
